## CORRECTION

# Correction: Comparative analysis of chloroplast genomes of seven *Juniperus* species from Kazakhstan

The *PLOS One* Staff

There are errors in the Author Contributions. The correct contributions are:

**Conceptualization:** Shyryn Almerekoa, Saule Abugalieva, Yerlan Turuspekov.

**Data curation:** Shyryn Almerekoa

**Formal analysis:** Shyryn Almerekoa, Moldir Yermagambetova

**Funding acquisition:** Shyryn Almerekoa

**Investigation:** Shyryn Almerekoa, Moldir Yermagambetova, Smatulla Jumanov.

**Methodology:** Shyryn Almerekoa

**Project administration:** Shyryn Almerekoa, Saule Abugalieva.

**Resources:** Shyryn Almerekoa, Smatulla Jumanov.

**Supervision:** Shyryn Almerekoa, Yerlan Turuspekov.

**Validation:** Shyryn Almerekoa, Saule Abugalieva.

**Writing—original draft:** Shyryn Almerekoa, Saule Abugalieva, Yerlan Turuspekov.

**Writing—review & editing:** Shyryn Almerekoa, Moldir Yermagambetova, Smatulla Jumanov, Saule Abugalieva, Yerlan Turuspekov.

The publisher apologizes for the error.

## Reference

1. Almerekova S, Yermagambetova M, Jumanov S, Abugalieva S, Turuspekov Y (2024) Comparative analysis of chloroplast genomes of seven *Juniperus* species from Kazakhstan. *PLOS ONE* 19(1): e0295550. <https://doi.org/10.1371/journal.pone.0295550>

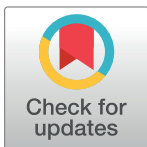

## OPEN ACCESS

**Citation:** The *PLOS One* Staff (2025) Correction: Comparative analysis of chloroplast genomes of seven *Juniperus* species from Kazakhstan. *PLoS ONE* 20(1): e0318596. <https://doi.org/10.1371/journal.pone.0318596>

**Published:** January 28, 2025

**Copyright:** © 2025 The PLOS One Staff. This is an open access article distributed under the terms of the [Creative Commons Attribution License](https://creativecommons.org/licenses/by/4.0/), which permits unrestricted use, distribution, and reproduction in any medium, provided the original author and source are credited.
